# Supplementary material for: Social rank-order stability of mice revealed by a novel food competition paradigm in combination with available space competition paradigms
Source: eLife. 2025 Jul 24;14:RP103748. doi: 10.7554/eLife.103748 (PMC12289308; doi:10.7554/eLife.103748)
Supplement: Figure 1—source data 1. [file elife-103748-fig1-data1.xlsx]

## Sheet: Fig1
		left
	Day1	2.44	2.54	6.44	24.06	5.14	29.3	18.34	19.56	41.48	18.48	27.06	12.44	7.56	21.56	19.54	57.02	33.24
	Day2	3.02	2.58	4.52	7.06	2.46	6.56	3.12	2.26	4.02	15.44	6.3	3.32	4.28	6.38	3.28	21.14	4.32
	Day3	14.2	4.22	6.5	11.46	3.26	3.42	5.48	3.5	5.52	3.54	10.32	2.34	2.26	3.18	9.02	5.2	2.44
	Day4	2.36	2.58	2.36	12.22	4.06	3.46	2.54	2.5	4.58	3.2	3.32	3.24	2.42	3.54	13.22	13.08	2.26
	Day5	2.34	2.1	3.02	2.1	2.08	2.4	2.12	2.28	3.14	2.38	3.52	2.26	3.2	2.56	2.02	2.08	2.34
		right
	Day1	13.52	5.04	6.38	8.36	5.54	14.56	4.32	17.32	4.08	14.18	22.06	7.52	9.56	71.2	10.26	47.46	14.52
	Day2	2.48	4.44	6.1	7.1	2.1	6.04	26	2.2	3.42	6.16	26.46	14.46	4.42	12.52	4.48	27.18	3.12
	Day3	3.52	2.2	2.32	21.4	2.48	3.16	3.16	2.2	2.42	4.56	3.48	8.36	4.54	2.44	3.34	5.48	2.26
	Day4	3.06	3.56	3.06	3.58	4.1	4.44	12.18	3.32	4.48	5.04	3.26	5.38	3.16	3.38	3.28	13.14	3.12
	Day5	1.44	2.02	3.26	2.5	2.18	2.26	3.04	3.36	2.16	3.04	5.14	3.26	2.18	2.54	2.16	1.56	2.36
												Figure 1E
			day1	day2	day3	day4
		groupA	0.5	0.5	0.75	0.75				Figure 1J
		groupB	0.5	0.5	0.25	0.25
