# Supplementary material for: Social rank-order stability of mice revealed by a novel food competition paradigm in combination with available space competition paradigms
Source: eLife. 2025 Jul 24;14:RP103748. doi: 10.7554/eLife.103748 (PMC12289308; doi:10.7554/eLife.103748)
Supplement: Figure 2—source data 1. [file elife-103748-fig2-data1.xlsx]

## Sheet: Fig2
		winner
	training(last day)	3.4375	7.57	3.865	4.9125	5.3325	5.0525	6.695	4.8275	5.12	5.51	4.2825	3.675	8.8375	5.4325	5.18	4.725
	test1 day1	3.93	4.9	3.66	3.21	6.47		5.67	3.32	3.74	5.93	6.79	5	3.89	3.9	5.08	5.79
	test1 day2	4.76	3.42	7.56	5.12	8.89		3.25	4.96	3.03	5.5	7.53	4.03	5.56	2.93	4.14	5.4
	test1 day3	6.93	3.9	6.39	7.93	6.47	5.93	4.55	2.68	4.44	3.86	3.33	4.14	5.2	4.16	5.55	3.28
	test1 day4	4.93	5.18	4.12	4.19	4.1	4.21	4.12	3.14	3.38	4.29	3.7	3.51	6.83	3.63	7.46	8.7
		loser
	training(last day)	4.1475	5.9525	4.5	4.32	4.35	4.49	7.1175	5.725	5.185	5.47	6.03	5.695	4.9625	4.2925	4.965	5.225
	test1 day1						6.87
	test1 day2						8.72
	test1 day3
	test1 day4
												Fig 2A
			winner	loser
		day1	1	0								Figure 2B
		day2	1	0
		day3	0	1
		day4	0	1
			winner
		day1	1	1	1	1	1	1	1	1	1	1	1	1	1	1	1
		day2	1	1	1	1	1	1	1	1	1	1	1	1	1	1	1
		day3	1	1	1	1	1	1	1	1	1	1	1	1	1	1	1
		day4	1	1	1	1	1	1	1	1	1	1	1	1	1	1	1
			loser
		day1	0	0	0	0	0	0	0	0	0	0	0	0	0	0	0
		day2	0	0	0	0	0	0	0	0	0	0	0	0	0	0	0
		day3	0	0	0	0	0	0	0	0	0	0	0	0	0	0	0		Figure 2C
		day4	0	0	0	0	0	0	0	0	0	0	0	0	0	0	0
			winner
		day 1	1	1	1	1	1	1	0	1	1	1	1	1	1	1	1	1
		day 2	1	1	1	1	1	1	0	1	1	1	1	1	1	1	1	1
		day 3	1	1	1	1	1	1	1	1	1	1	1	1	1	1	1	1
		day 4	1	1	1	1	1	1	1	1	1	1	1	1	1	1	1	1
			loser
		day 1	0	0	0	0	0	0	1	0	0	0	0	0	0	0	0	0
		day 2	0	0	0	0	0	0	1	0	0	0	0	0	0	0	0	0
		day 3	0	0	0	0	0	0	0	0	0	0	0	0	0	0	0	0	Figure 2D
		day 4	0	0	0	0	0	0	0	0	0	0	0	0	0	0	0	0
			Rate									winner	loser
		pair 1	100									23.47	14.07
		pair 2	100									41.47	35.78
		pair 3	100									9.36	2.49
		pair 4	100									29.92	34.96
		pair 5	100									14.61	12.64
		pair 6	100									12.81	13.08						Figure 2F
		pair 7	75									27.34	11.52
		pair 8	100									20.53	17.9
		pair 9	100									31.65	22.66
		pair 10	100									6.88	12.6
		pair 11	100		Figure 2E							28.1	14.9
		pair 12	100									19.8	10.64
		pair 13	100									20.85	9.88
		pair 14	100									17.66	11.26
		pair 15	100									23.8	14.86
		pair 16	100									14.99	26.36
		winner	loser
		19.686	19.35
		19.94	19.982
		20.038	20.44
		20.008	19.404
		19.602	20.172
		19.264	19.95
		20.188	20.502
		20.606	20.626
		18.888	19.77
		19.434	19.244
		19.714	18.99
		21.268	20.73
		21.222	19.586
		20.724	21.374		Figure 2G
		22.19	22.685
		20.5575	21.0475
			winner
		day 1	1	1	1	1	1	1	1	1	1	1	1	1	1	1	1	1
		day 2	1	1	1	1	1	1	1	1	1	1	1	1	1	1	1	1
		day 3	1	1	1	1	1	1	1	1	1	1	1	1	1	1	1	1
		day 4	1	1	1	1	1	1	1	1	1	1	1	1	1	1	1	1
			loser
		day 1	0	0	0	0	0	0	0	0	0	0	0	0	0	0	0	0
		day 2	0	0	0	0	0	0	0	0	0	0	0	0	0	0	0	0
		day 3	0	0	0	0	0	0	0	0	0	0	0	0	0	0	0	0		Figure 2J
		day 4	0	0	0	0	0	0	0	0	0	0	0	0	0	0	0	0
