# Supplementary material for: Social rank-order stability of mice revealed by a novel food competition paradigm in combination with available space competition paradigms
Source: eLife. 2025 Jul 24;14:RP103748. doi: 10.7554/eLife.103748 (PMC12289308; doi:10.7554/eLife.103748)
Supplement: Figure 3—source data 1. [file elife-103748-fig3-data1.xlsx]

## Sheet: Fig3
			winner
		training(last day)	3.2175	2.975	3.32	3.1025	4.035	3.25	3.9575	4.1625	2.8175	2.89
		test1 day1	4.85	5.47	4	3.5		5.97	5.18		3.13	4.03
		test1 day2	3.5	3.12	5.53	5.15	6.28	5.25	5.4		5.22	5.94
		test1 day3	2.85	4.22		5.44	3.81	3.44	5.18	4.53	2.06	7.44
		test1 day4	4.94	7.44	5.62	4.44	3.13	3.06	10.88	3.66	2.66	5.96
			loser
		training(last day)	3.7325	2.8825	3.695	2.725	2.86	3.2225	2.18	3.6375	4.6075	2.74
		test1 day1					8.24			4.34
		test1 day2								8.15
		test1 day3			9.25
		test1 day4
								Figure 3A
			winner	loser
		day1	1	0					Figure 3B
		day2	1	0
		day3	0	1
		day4	1	0
			winner	loser
		day1	0	1					Figure 3C
		day2	1	0
		day3	1	0
		day4	1	0
			winner	loser
		day1	1	0					Figure 3D
		day2	1	0
		day3	0	1
		day4	0	1
			winner
		day1	1	1	1	1	1	1	1
		day2	1	1	1	1	1	1	1
		day3	1	1	1	1	1	1	1					Figure 3E
		day4	1	1	1	1	1	1	1
			loser
		day1	0	0	0	0	0	0	0
		day2	0	0	0	0	0	0	0
		day3	0	0	0	0	0	0	0
		day4	0	0	0	0	0	0	0
			winner
		day1	1	1	1	1	0	1	1	1	1	1
		day2	1	1	1	1	1	1	1	1	1	1
		day3	1	1	0	1	1	1	1	1	1	1						Figure 3F
		day4	1	1	1	1	1	1	1	1	1	1
			loser
		day1	0	0	0	0	1	0	0	0	0	0
		day2	0	0	0	0	0	0	0	0	0	0
		day3	0	0	1	0	0	0	0	0	0	0
		day4	0	0	0	0	0	0	0	0	0	0
		Rate											winner	loser
		100										group1	38.38	36.77
		100										group2	37	35.81
		75				Figure 3G						group3	38.88	20.4				Figure 3H
		100										group4	26.03	20.53
		75										group5	43.38	35.02
		100										group6	38.95	29.74
		100										group7	40.03	33.91
		50										group8	36.57	31.62
		100										group9	16.88	18.36
		100										group10	28.96	14.76
			winner	loser
		group1	14.008	14.588
		group2	14.528	14.636
		group3	13.328	13.668				Figure 3I
		group4	14.51	14.058
		group5	14.638	13.912
		group6	12.536	13.744
		group7	14.166	14.35
		group8	13.48	13.812
		group9	13.414	13.22
		group10	12.932	13.084
			winner
		day1	1	1	1	1	1	1	1	1	1	1
		day2	1	1	1	1	1	1	1	1	1	1
		day3	1	1	1	1	1	1	1	1	1	1						Figure 3K
		day4	1	1	1	1	1	1	1	1	1	1
			loser
		day1	0	0	0	0	0	0	0	0	0	0
		day2	0	0	0	0	0	0	0	0	0	0
		day3	0	0	0	0	0	0	0	0	0	0
		day4	0	0	0	0	0	0	0	0	0	0
			winner	loser
		group1	292	185
		group2	487	361
		group3	642	134				Figure 3M
		group4	244	229
		group5	289	381
		group6	414	152
		group7	362	203
		group8	465	368
		group9	372	138
		group10	313	238
			FPCT vs tube test	FPCT vs WST	tube test vs WST
		pair 1	0	100	0
		pair 2	100	100	100
		pair 3	100	100	100					Figure 3N
		pair 4	100	100	100
		pair 5	100	0	0
		pair 6	100	100	100
		pair 7	100	100	100
		pair 8	100	100	100
		pair 9	100	100	100
		pair 10	100	100	100
