# Supplementary material for: Social rank-order stability of mice revealed by a novel food competition paradigm in combination with available space competition paradigms
Source: eLife. 2025 Jul 24;14:RP103748. doi: 10.7554/eLife.103748 (PMC12289308; doi:10.7554/eLife.103748)
Supplement: Figure 4—source data 1. [file elife-103748-fig4-data1.xlsx]

## Sheet: Fig4
			class1	class2	class3
		day1	2	1	0
		day2	2	1	0
		day3	2	1	0						Figure 4B
		day4	2	1	0
		day5	1	2	0
		day6	2	1	0
		day7	2	1	0
		day8	2	1	0
		day9	2	1	0
			class1	class2	class3
		day1	1	2	0
		day2	2	1	0
		day3	2	1	0						Figure 4C
		day4	2	1	0
		day5	2	1	0
		day6	2	1	0
		day7	2	1	0
		day8	2	1	0
		day9	2	1	0
			class1	class2	class3
		day1	2	1	0
		day2	2	1	0
		day3	1	2	0
		day4	2	1	0						Figure 4D
		day5	2	1	0
		day6	2	1	0
		day7	2	1	0
		day8	2	1	0
		day9	2	1	0
			class1	class2	class3
		day1	2	1	0
		day2	2	1	0
		day3	2	1	0						Figure 4E
		day4	2	1	0
		day5	2	1	0
		day6	2	1	0
		day7	2	1	0
		day8	2	1	0
		day9	1	0	2
			class1	class2	class3
		day1	2	1	0
		day2	2	1	0
		day3	2	1	0						Figure 4F
		day4	2	1	0
		day5	2	0	1
		day6	2	0	1
		day7	2	0	1
		day8	2	0	1
		day9	1	2	0
			class1	class2	class3
		day1	2	1	0
		day2	2	1	0
		day3	2	1	0
		day4	2	1	0							Figure 4G
		day5	1	2	0
		day6	1	2	0
		day7	1	2	0
		day8	1	2	0
		day9	2	1	0
			class1			class2			class3
		day1	2	2	2	1	1	1	0	0	0
		day2	2	2	2	1	1	1	0	0	0
		day3	2	2	2	1	1	1	0	0	0					Figure 4H
		day4	2	2	2	1	1	1	0	0	0
		day5	2	2	2	1	1	1	0	0	0
		day6	2	2	2	1	1	1	0	0	0
		day7	2	2	2	1	1	1	0	0	0
		day8	2	2	2	1	1	1	0	0	0
		day9	2	2	2	1	1	1	0	0	0
			class1
		day1	2	1	2	2	2	2	2	2	2
		day2	2	2	2	1	2	2	2	2	2
		day3	2	2	2	2	2	2	2	2	2
		day4	2	2	2	2	2	2	2	2	2
		day5	1	2	2	2	2	2	2	2	2
		day6	2	2	2	2	2	2	2	2	2
		day7	2	2	2	2	2	2	2	2	2
		day8	2	2	2	2	2	2	2	2	2
		day9	2	2	2	2	1	2	2	2	2
			class2
		day1	1	2	1	1	1	1	1	1	1
		day2	1	1	1	2	1	1	1	1	1
		day3	1	1	1	1	1	1	1	1	1
		day4	1	1	1	1	1	1	1	1	1
		day5	2	1	1	1	1	1	1	1	1
		day6	1	1	1	1	1	1	1	1	1
		day7	1	1	1	1	1	1	1	1	1
		day8	1	1	1	1	1	1	1	1	1
		day9	1	1	1	1	0	1	1	1	1
			class3
		day1	0	0	0	0	0	0	0	0	0
		day2	0	0	0	0	0	0	0	0	0
		day3	0	0	0	0	0	0	0	0	0
		day4	0	0	0	0	0	0	0	0	0
		day5	0	0	0	0	0	0	0	0	0
		day6	0	0	0	0	0	0	0	0	0
		day7	0	0	0	0	0	0	0	0	0
		day8	0	0	0	0	0	0	0	0	0
		day9	0	0	0	0	2	0	0	0	0
										Figure 4I
			FPCT vs tube test	FPCT vs WST	tube test vs WST
		group 1	33.3333	100	100					Figure 4K
		group 2	100	100	100
		group 3	100	100	100
		group 4	100	100	100
		group 5	100	0	0
		group 6	33.3333	33.3333	0
		group 7	33.3333	100	33.3333
		group 8	100	100	100
		group 9	100	100	100
